# Supplementary material for: FRS2-independent GRB2 interaction with FGFR2 is not required for embryonic development
Source: PubMed Central journal article supplement (PMC10399203; doi:10.1242/bio.059942), 2023-07-27

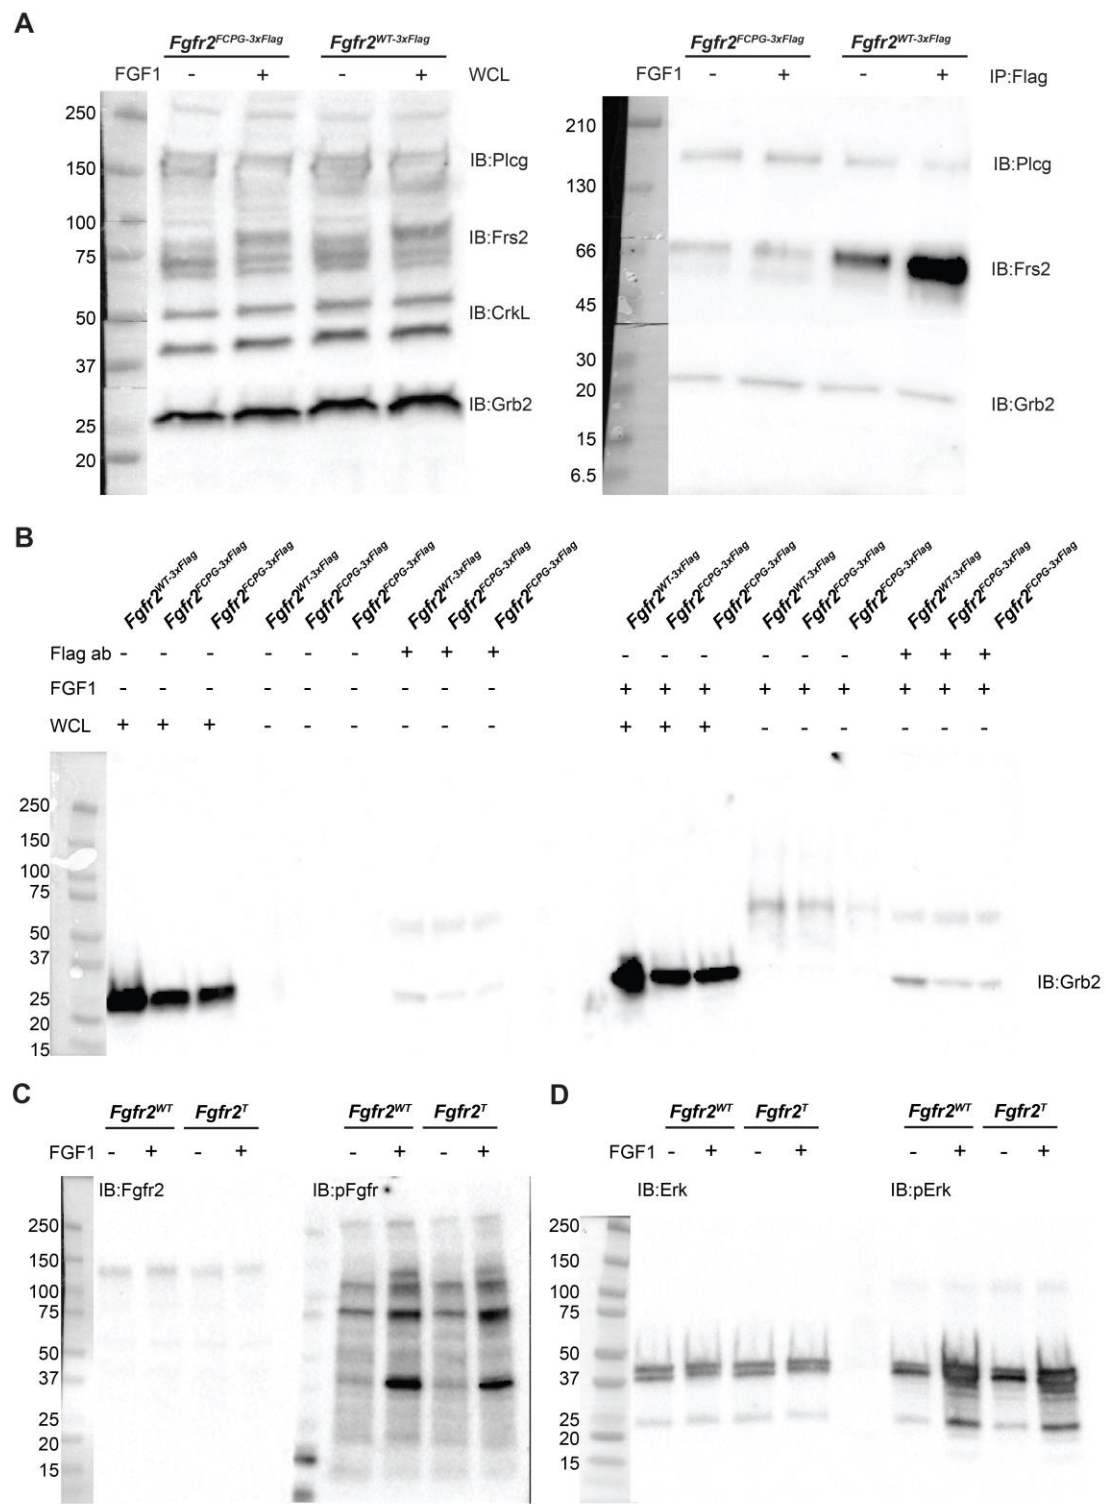

**Fig. S1. Generation of novel *Fgfr2<sup>T</sup>* and *Fgfr2<sup>FCPGT</sup>* allele in vivo.** A) Uncropped Western blots from Figure 1. Molecular marker used in the left blot was Bio-Rad Precision Plus Protein Dual Color Standards. The marker used on the right blot was Bio-Rad Prestained SDS-PAGE Broad Range Standards. B) GRB2 is bound to *Fgfr2<sup>WT</sup>*-3xFlag and *Fgfr2<sup>FCPGT</sup>*-3xFlag in both the absence and presence of FGF1. Pull down of GRB2 is not observed in the absence of FLAG antibody, using only IgG. Molecular marker used in this blot was Bio-Rad Precision Plus Protein Dual Color Standards. C) Homozygous *Fgfr2<sup>T</sup>* embryonic fibroblasts show comparable levels of FGFR2 expression and exhibit similar levels of pFGFR in response to FGF1 treatment, compared to wild type. Molecular marker used in this blot was Bio-Rad Precision Plus Protein Dual Color Standards. D) Homozygous *Fgfr2<sup>T</sup>* embryonic fibroblasts show similar pErk activation in response to FGF1 treatment compared to wild type. Molecular marker used in this blot was Bio-Rad Precision Plus Protein Dual Color Standards.

**Table S1. Oligonucleotides used in this study**

|              |                                                                                                                                                                          |
|--------------|--------------------------------------------------------------------------------------------------------------------------------------------------------------------------|
| T_sgRNA      | 5':CAGACAGGGTTCATAAGGCATGG:3'                                                                                                                                            |
| T_ssODN      | 5':TTACCCCGACACAAGGAGCTCTTGTTCTTCAGGGGACGATTCTGTGTTTTCTC<br>CAGACCCGATGCCATACGAGCCTTGTCTGCCTCAGTGACCATGGATAAACGGCA<br>GTGTTAAACATGAGTGAATGTGTCTTCTGTCCCAAACAGGACAGCAC:3' |
| T_for_primer | 5':TTCAGGGTAGCCTGGAGTGA:3'                                                                                                                                               |
| T_rev_primer | 5':TGCGGCTGTCCACTTATCAG:3'                                                                                                                                               |

### Dataset 1. *Fgfr2<sup>T</sup>* sequence.

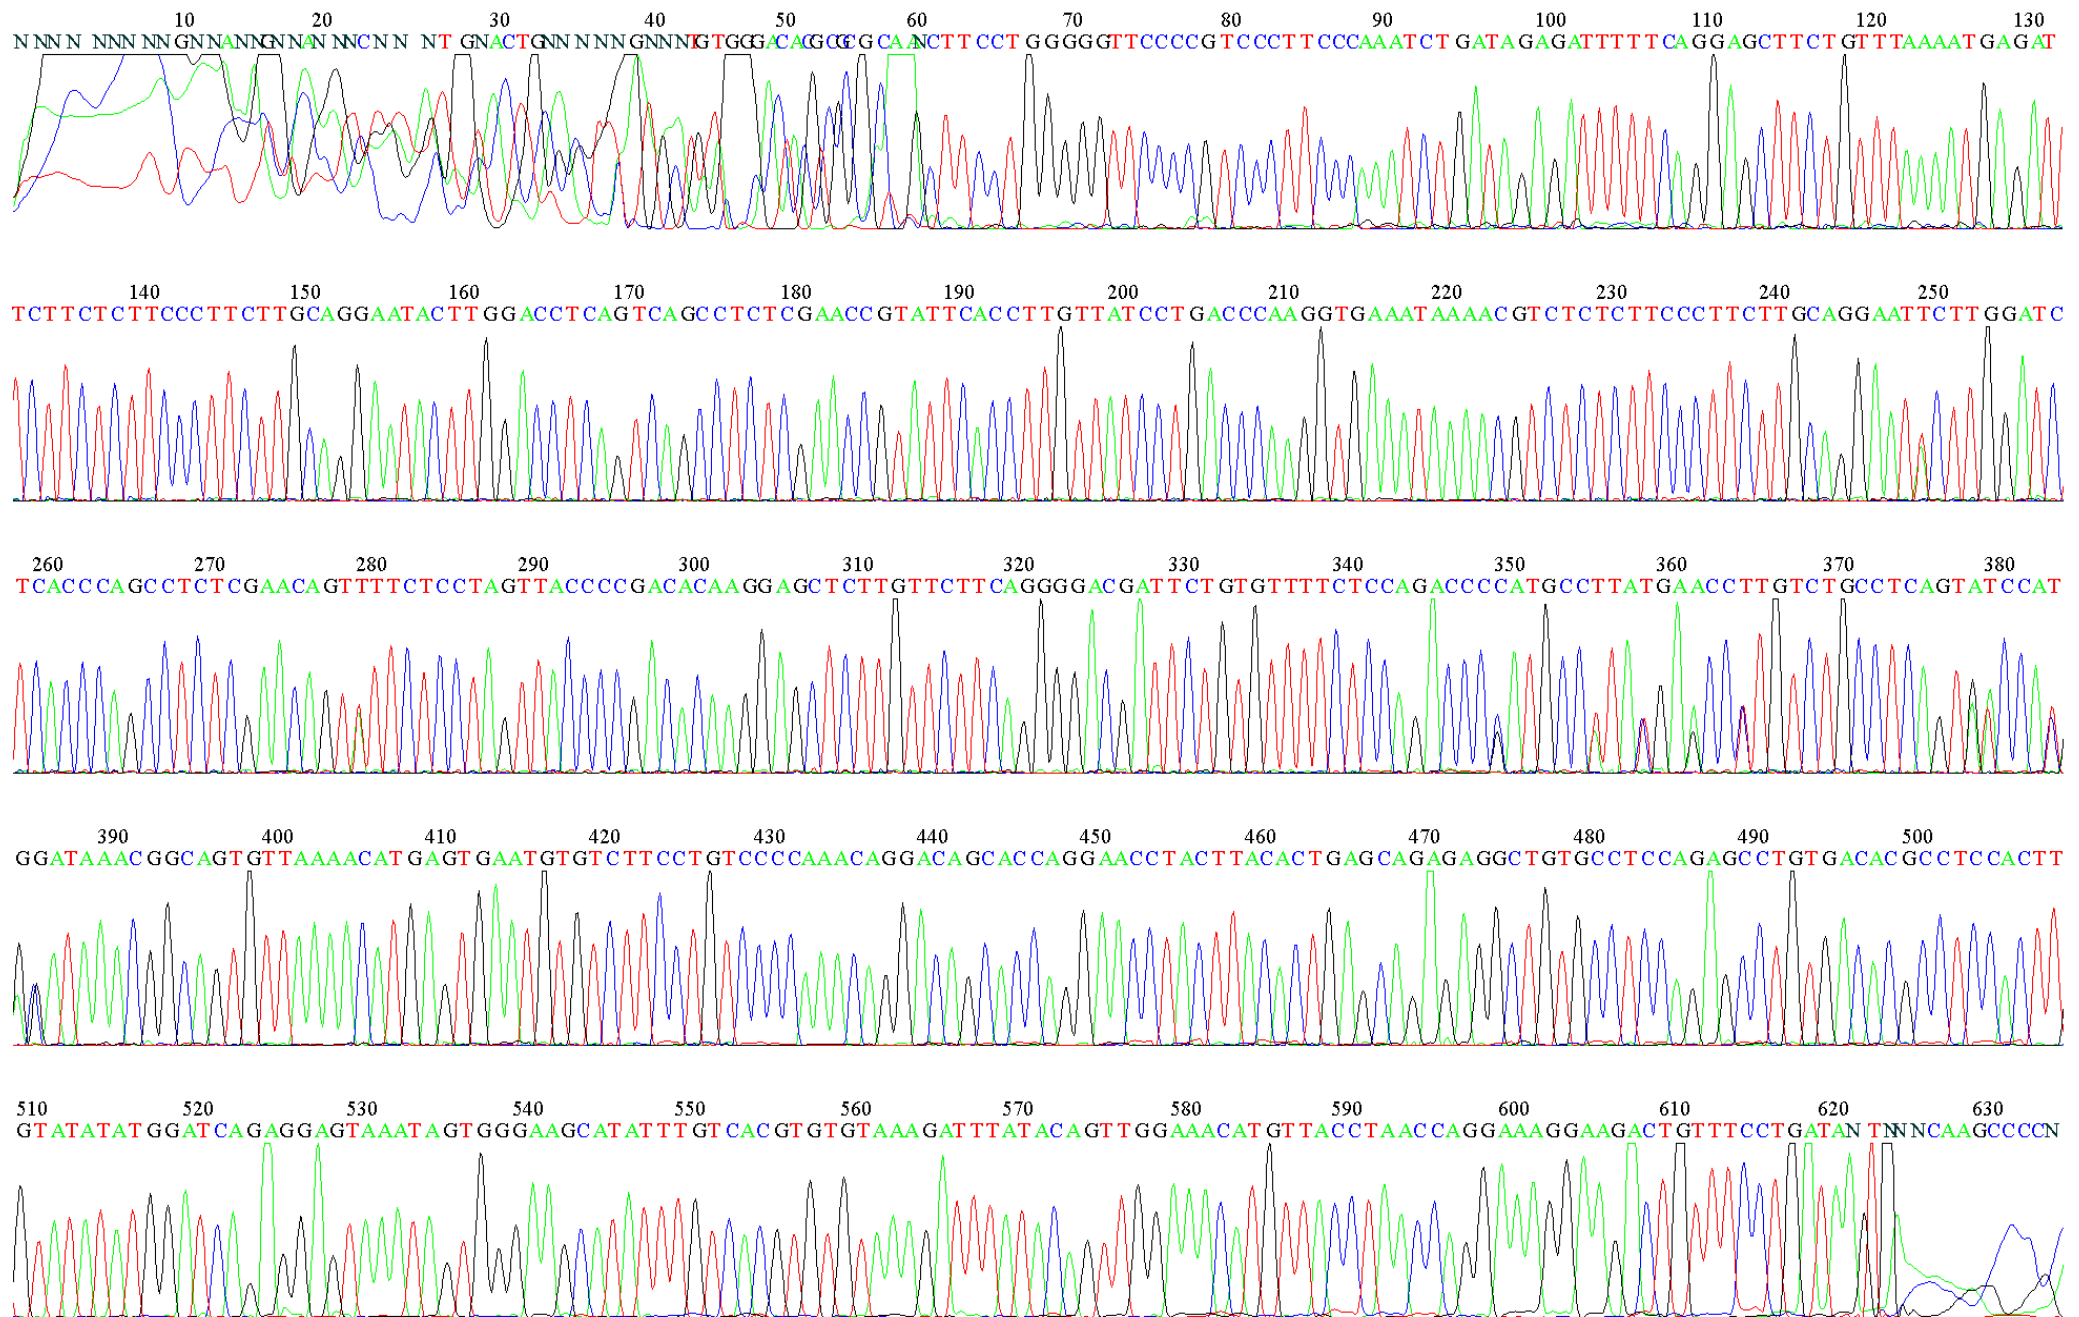

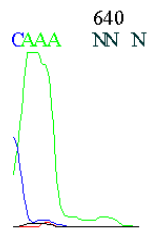

### Dataset 2. *Fgfr2<sup>FCPGT</sup>* sequence.

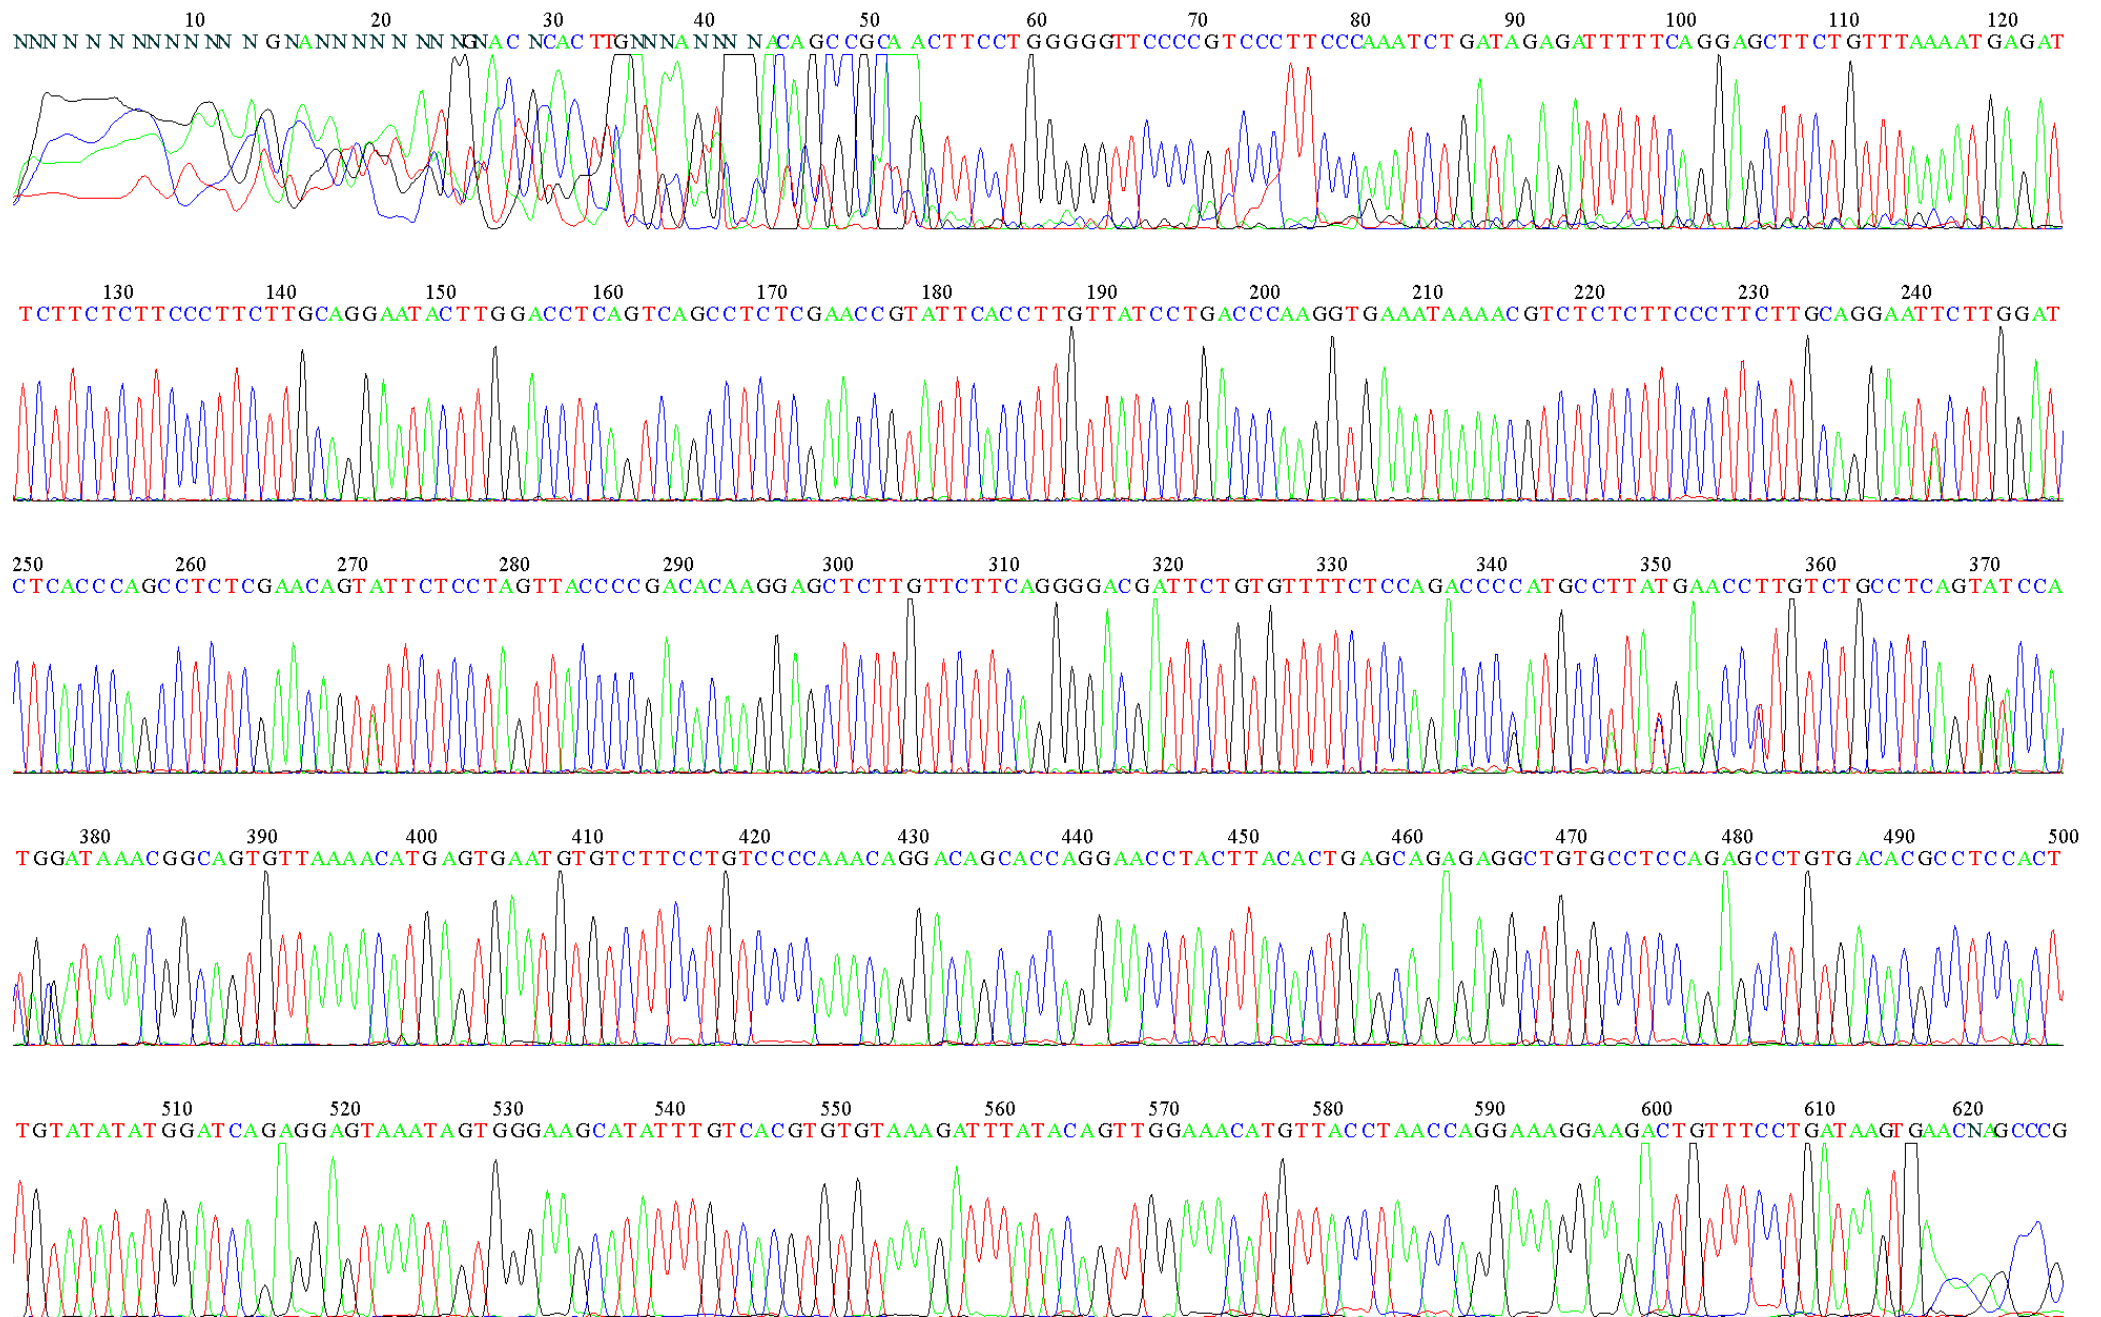

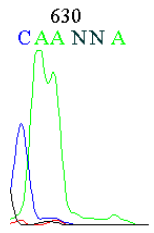

Supplement: biolopen-12-059942-s1.pdf [file biolopen-12-059942-s1.pdf]
